# Supplementary material
Source: Springer Nature journal article supplement (https://www.springermedizin.de/resource/supplementary/12885_2013_4153_MOESM13_ESM.pdf/9465582)

**A****HCT116**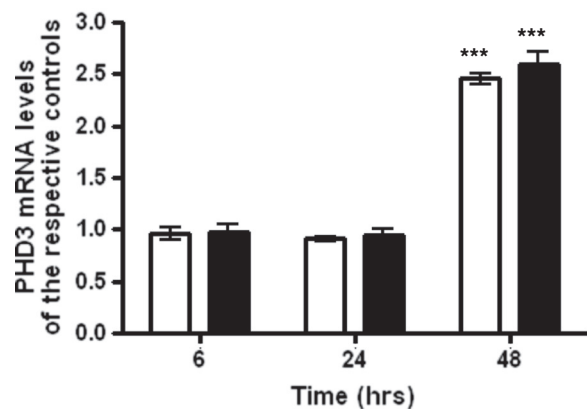**DLD-1**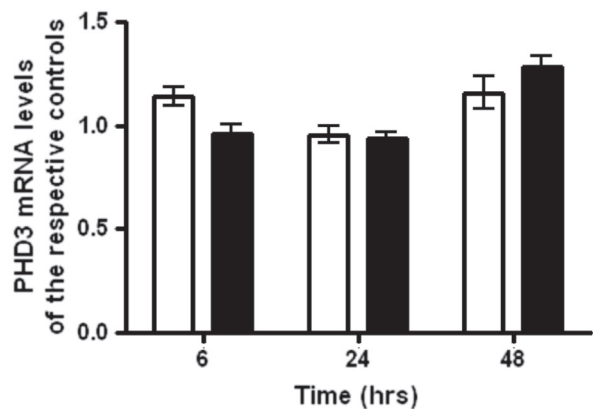**B****HCT116**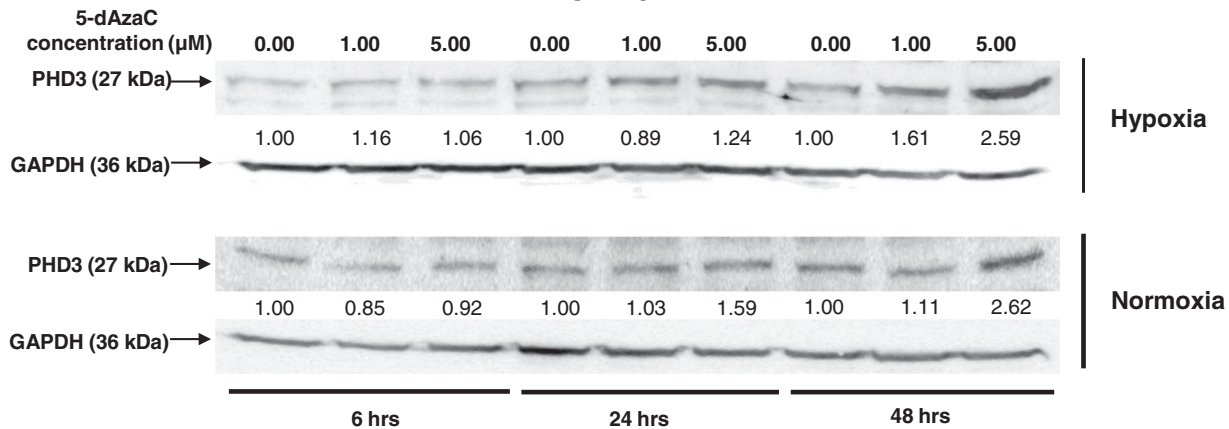**DLD-1**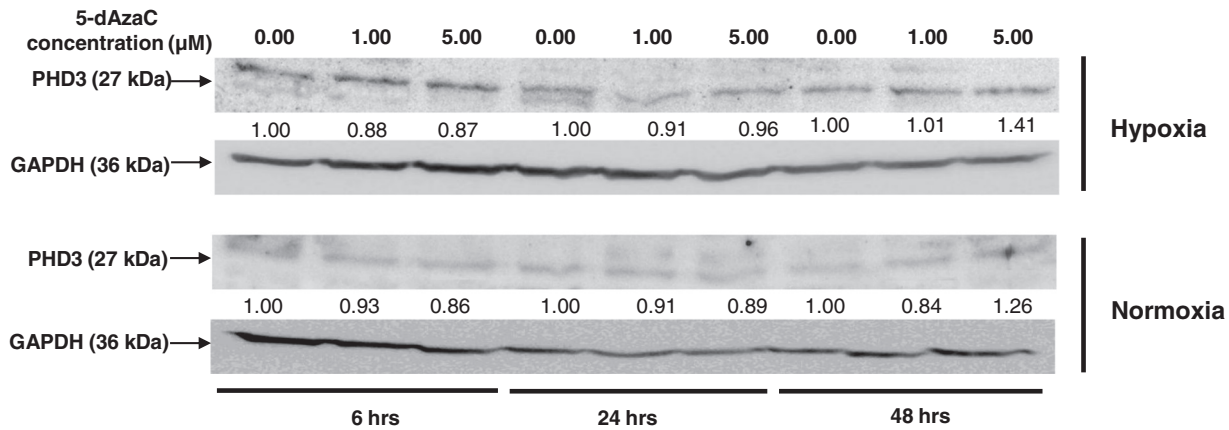

Supplement: MOESM13 [file 9465582]
